# Supplementary material for: Towards fluorinated Ruddlesden–Popper perovskites with enhanced physical properties: a study on (3-FC6H4CH2CH2NH3)2PbI4 single crystals
Source: Royal Society of Chemistry journal article supplement (doi:10.1039/d1qm00329a), 2021-01-01
Supplement: d1qm00329a1.pdf [file d1qm00329a1.pdf]

Supplementary Information for:

**Towards Fluorinated Ruddlesden-Popper Perovskites with Enhanced Physical Properties: A Study on (3-FC<sub>6</sub>H<sub>4</sub>CH<sub>2</sub>CH<sub>2</sub>NH<sub>3</sub>)<sub>2</sub>PbI<sub>4</sub> Single Crystals**

*Xiangxin Tian, Zhaoxing Hu, Zeliang Gao, Yongzhuan Zhang, Chuanming Li, Hongwei Qi, Xiuping Liu, Rongkun Zheng, Jiangtao Xu, and Jingquan Liu*

School of Materials Science and Engineering, Linyi University, Linyi, 276000, Shandong, China.

State Key Lab of Crystal Materials, Shandong University, Jinan, 250100, Shandong, China.

School of Chemistry & Chemical Engineering, Linyi University, Linyi, 276000, Shandong, China.

School of Physics, The University of Sydney, NSW, 2006, Australia

**Table of Contents**

**Figure S1.** Two-dimensional C-F····H-C hydrogen bond network.

**Figure S2.** The C-F····H-C hydrogen bonding interactions within the spacer cation slabs.

**Figure S3.** The weak N-H····I hydrogen bonding interactions (dashed lines) between the organic and inorganic layers in (3-FPEA)<sub>2</sub>PbI<sub>4</sub>.

**Figure S4.** The weak N-H····I hydrogen bonding interactions between the organic cations and the inorganic layers in (3-FPEA)<sub>2</sub>PbI<sub>4</sub>.

**Figure S5.** Thermogravimetric (TG) analysis and differential scanning calorimetry (DSC) plots of (3-FPEA)<sub>2</sub>PbI<sub>4</sub> crystals within the temperature range of -175 ~ 50 °C.

**Figure S6.** Thermogravimetric (TG) analysis and differential scanning calorimetry (DSC) plots of (PEA)<sub>2</sub>PbI<sub>4</sub>.

**Figure S7.** Images of four MAPbI<sub>3</sub> perovskite powders when placed under humidity for different time.

**Figure S8.** (a) Images of (3-FPEA)<sub>2</sub>PbI<sub>4</sub> powders after being placed in humidity for different time. (b) PXRD patterns of the freshly synthesized and aged (12 days) (3-FPEA)<sub>2</sub>PbI<sub>4</sub> powders.

**Figure S9.** The partial density of states of (3-FPEA)<sub>2</sub>PbI<sub>4</sub>.

**Figure S10.** Photoluminescence spectra of  $(3\text{-FPEA})_2\text{PbI}_4$  based on single crystal and polycrystalline samples, respectively. (a) Single crystals employed in the spectrum recoding. (b) The corresponding photoluminescence spectra.

**Figure S11.** Residues for the lifetime decay fittings of  $(3\text{-FPEA})_2\text{PbI}_4$ .

**Table S1.** Atomic coordinates ( $\times 10^4$ ) and equivalent isotropic displacement parameters ( $\text{\AA}^2 \times 10^3$ ) for  $(3\text{-FPEA})_2\text{PbI}_4$ .

**Table S2.** Bond lengths [ $\text{\AA}$ ] and angles [ $^\circ$ ] for  $(3\text{-FPEA})_2\text{PbI}_4$  single crystal.

**Table S3.** Anisotropic displacement parameters for  $(3\text{-FPEA})_2\text{PbI}_4$  single crystal.

**Table S4.** Hydrogen coordinates ( $\times 10^4$ ) and isotropic displacement parameters ( $\text{\AA}^2 \times 10^3$ ) for  $(3\text{-FPEA})_2\text{PbI}_4$  single crystal.

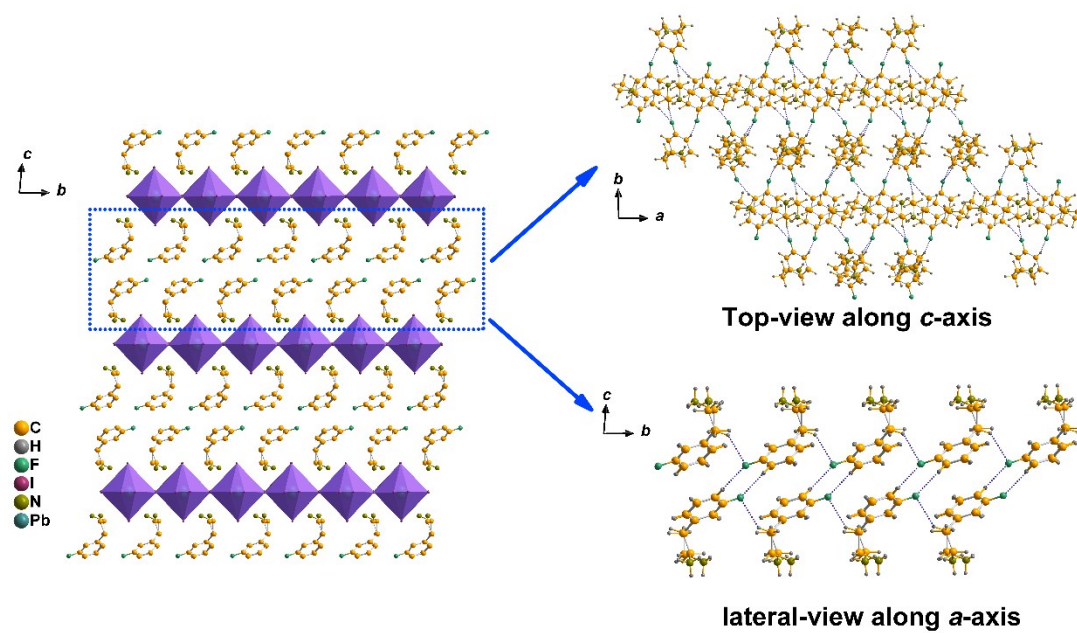

**Figure S1.** Two-dimensional C-F...H-C hydrogen bond network. Clearly, the spacer cations interact with each other by weak hydrogen bonds, forming an interconnected cationic bilayer and improving the stability of the materials. Parts of H atoms are omitted for clarity.

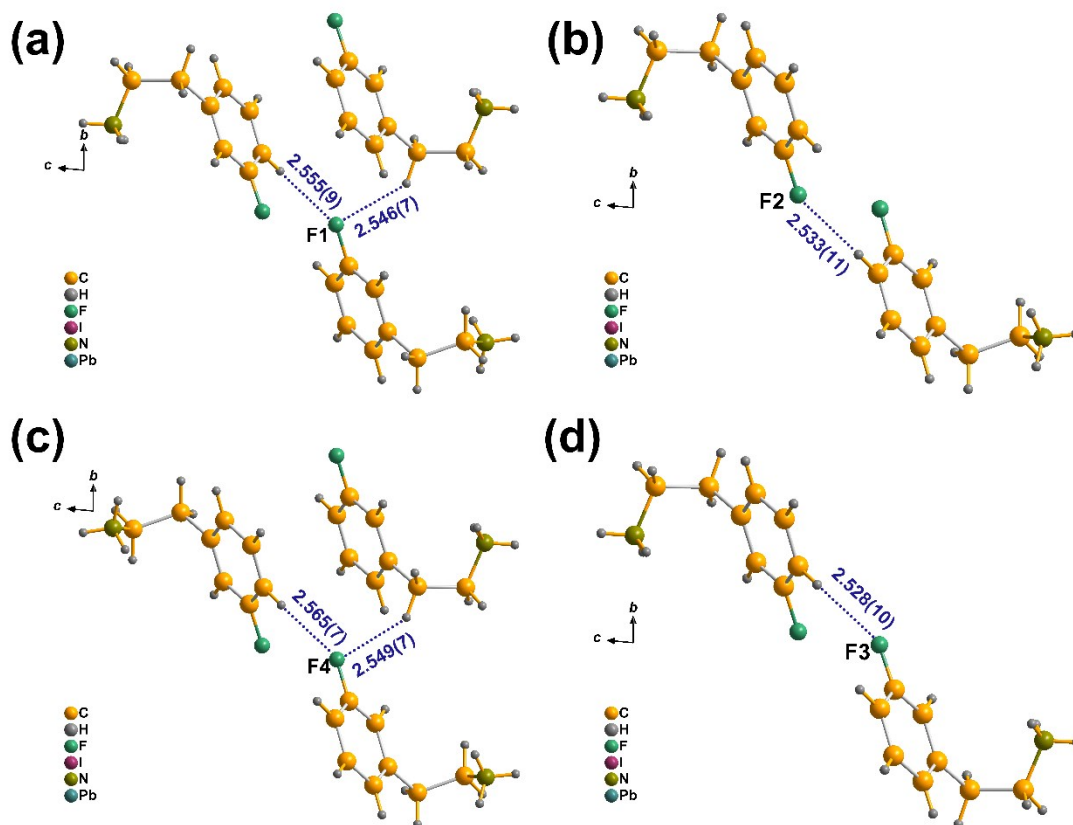

**Figure S2.** The C-F $\cdots$ H-C hydrogen bonding interactions within the spacer cation slabs. (a)~(d) presents the ball-and-stick representations around the F1, F2, F4, and F3, respectively, where F1 and F4 are related to two adjacent 3-fluorophenethylamine cations by forming hydrogen bonding interactions with one hydrogen atom on the C of the benzene ring and the other on the ethylamine branch, respectively, while F2 and F4 forms hydrogen bonding interactions with only one H atom on the C of the benzene ring.

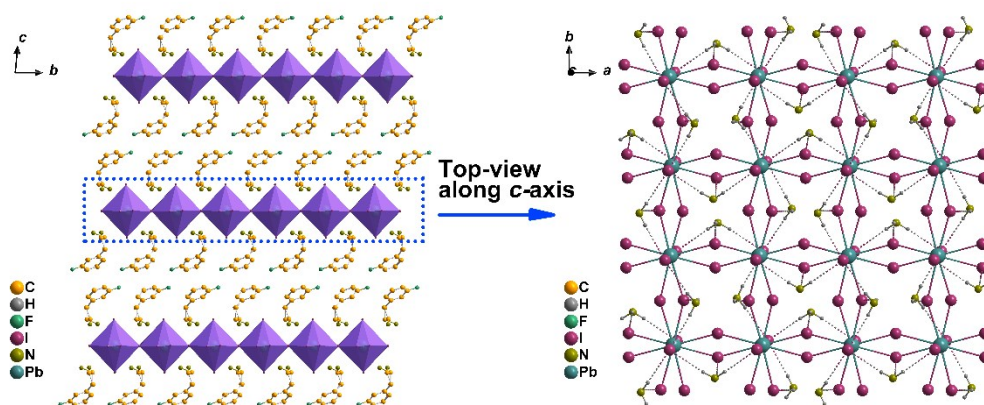

**Figure S3.** The weak N-H...I hydrogen bonding interactions (dashed lines) between the organic and inorganic layers in  $(3\text{-FPEA})_2\text{PbI}_4$ . Parts of H atoms are omitted for clarity.

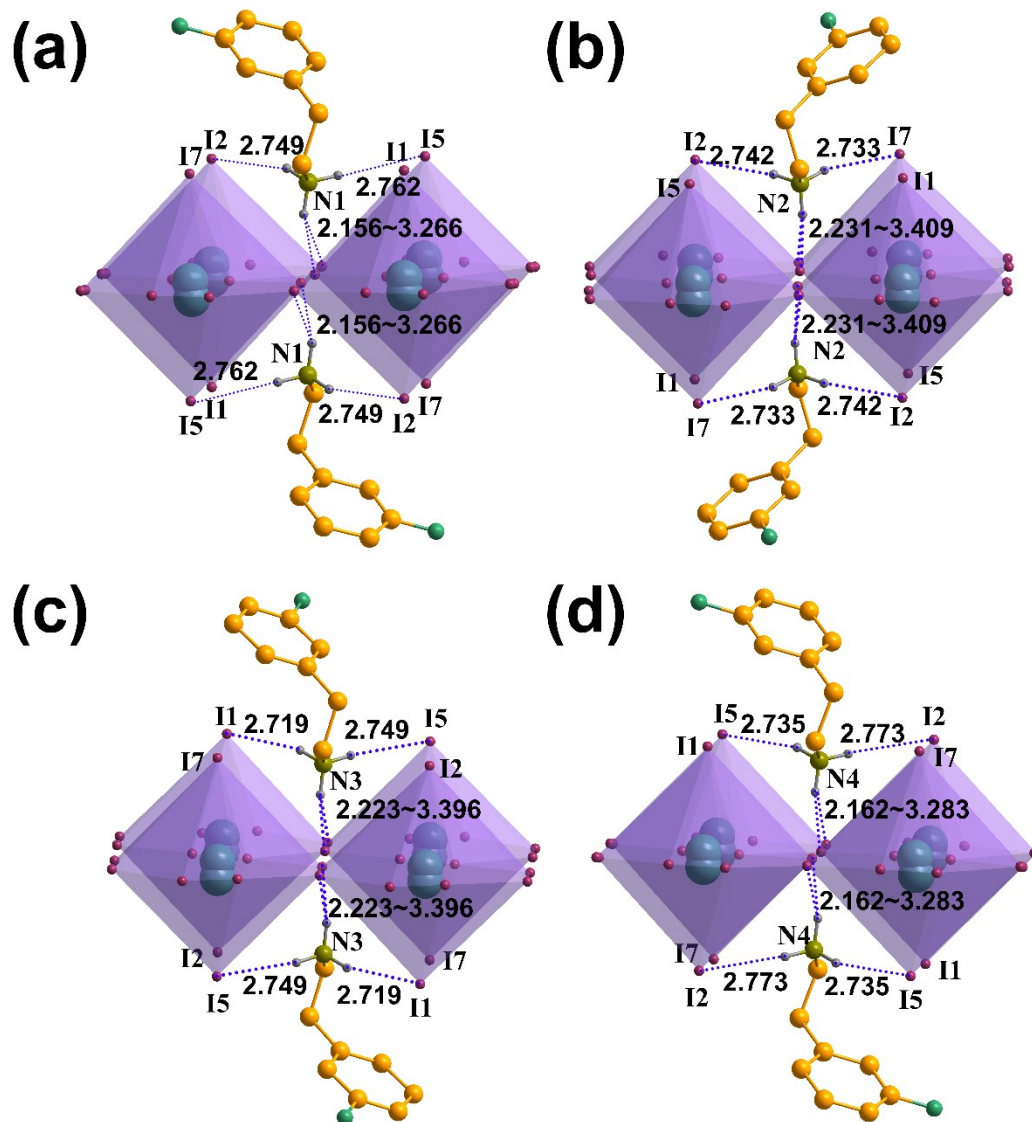

**Figure S4.** The weak N-H...I hydrogen bonding interactions between the organic cations and the inorganic layers in  $(3\text{-FPEA})_2\text{PbI}_4$ . Parts of H atoms are omitted for clarity.

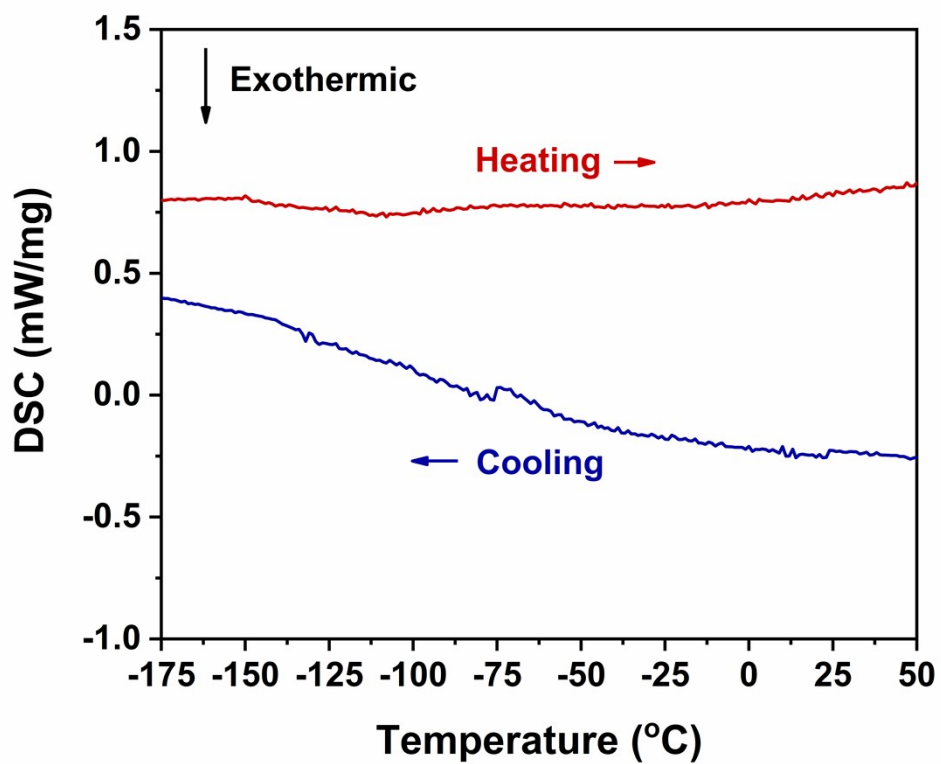

**Figure S5.** Thermogravimetric (TG) analysis and differential scanning calorimetry (DSC) plots of (3-FPEA)<sub>2</sub>PbI<sub>4</sub> crystals within the temperature range of -175 ~ 50 °C.

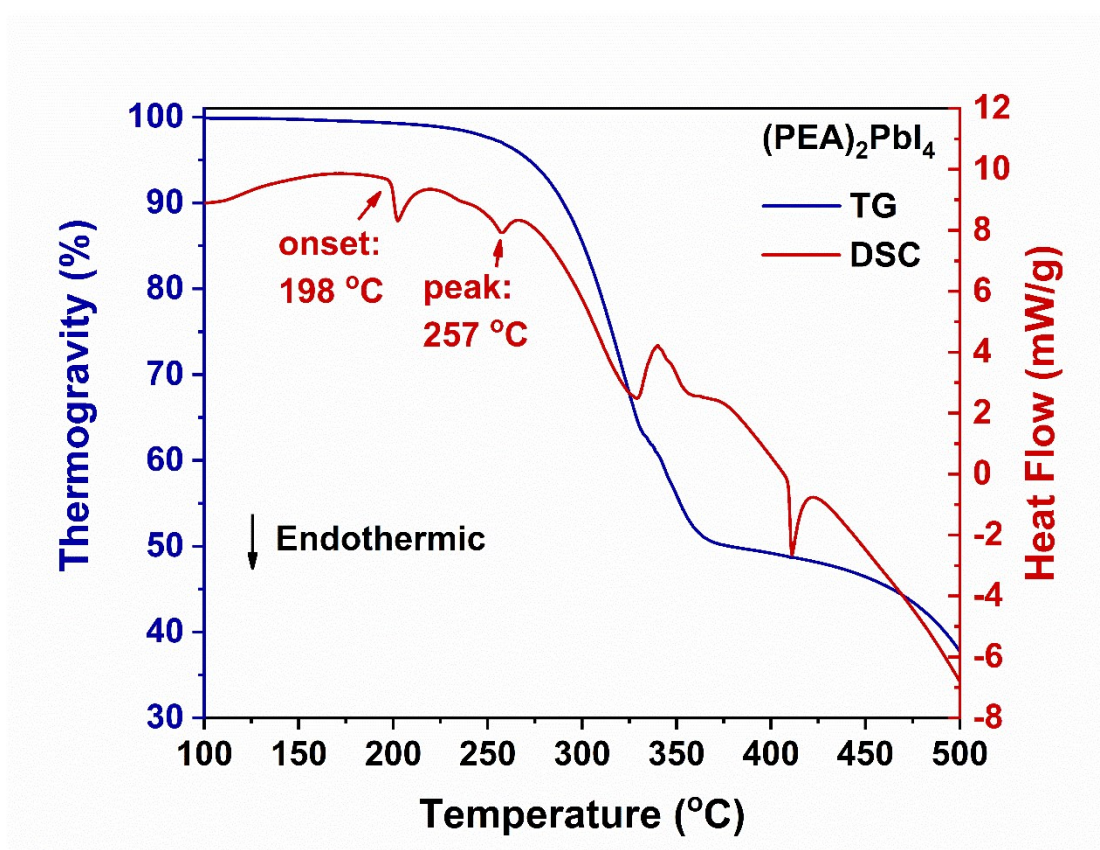

**Figure S6.** Thermogravimetric (TG) analysis and differential scanning calorimetry (DSC) plots of  $(\text{PEA})_2\text{PbI}_4$ .



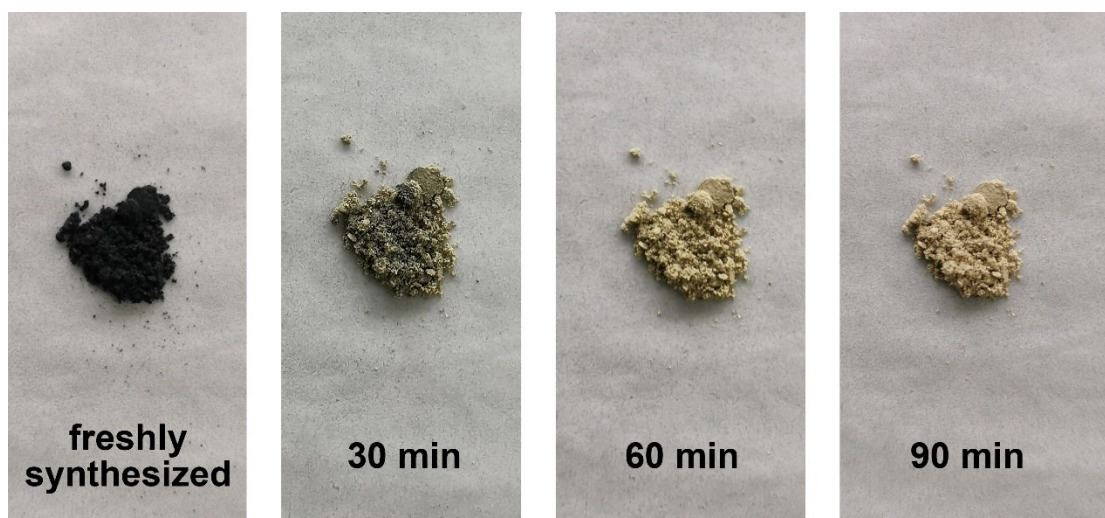

**Figure S7.** Images of four  $\text{MAPbI}_3$  perovskite powders when placed under humidity for different time.

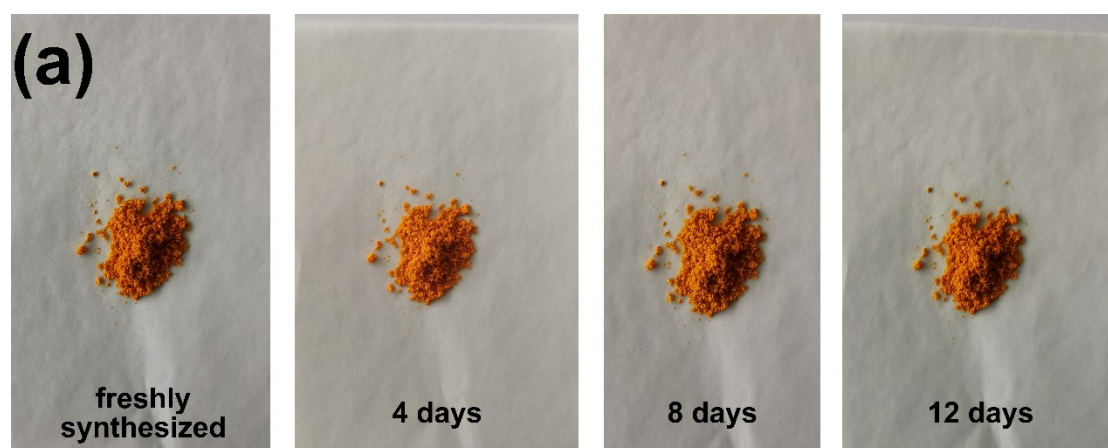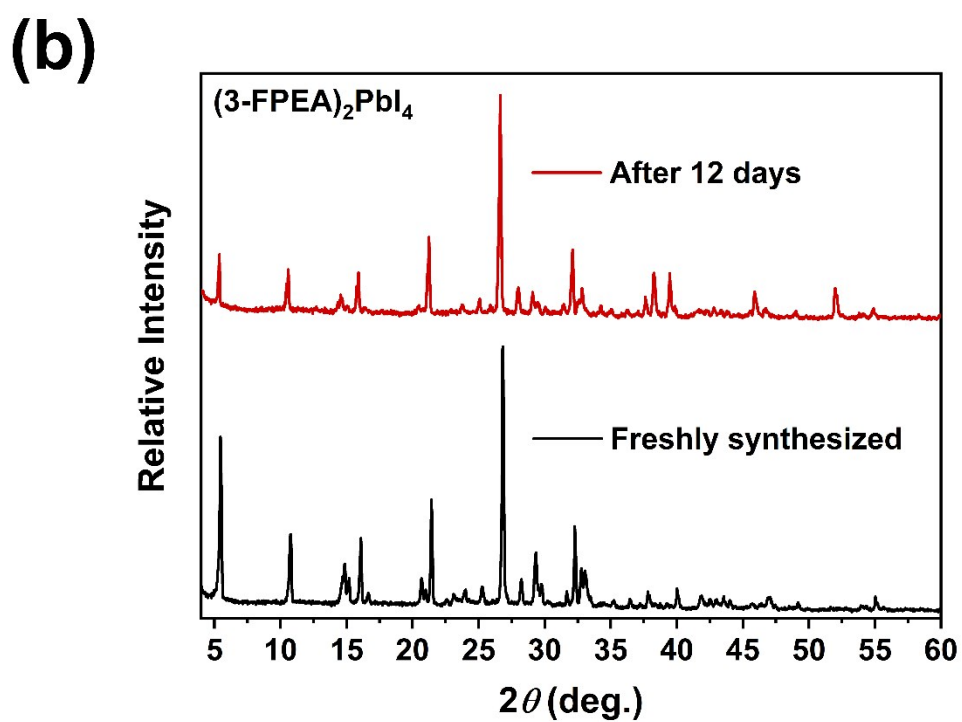

**Figure S8.** (a) Images of  $(3\text{-FPEA})_2\text{PbI}_4$  powders after being placed in humidity for different time. (b) PXRD patterns of the freshly synthesized and aged (12 days)  $(3\text{-FPEA})_2\text{PbI}_4$  powders.

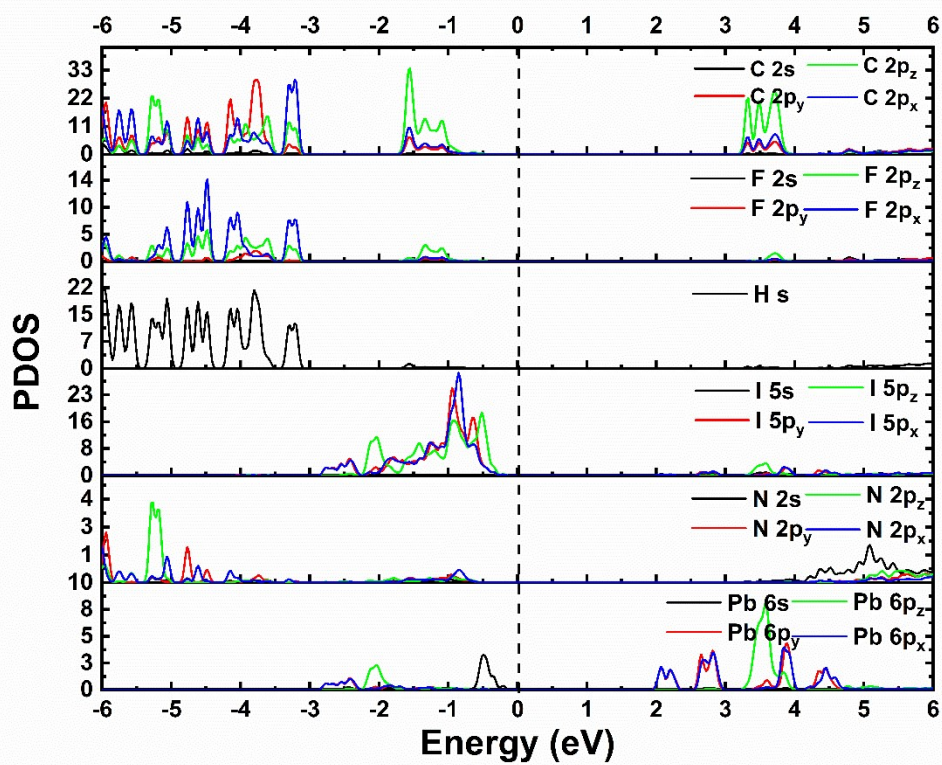

**Figure S9.** The partial density of states of  $(3\text{-FPEA})_2\text{PbI}_4$ .

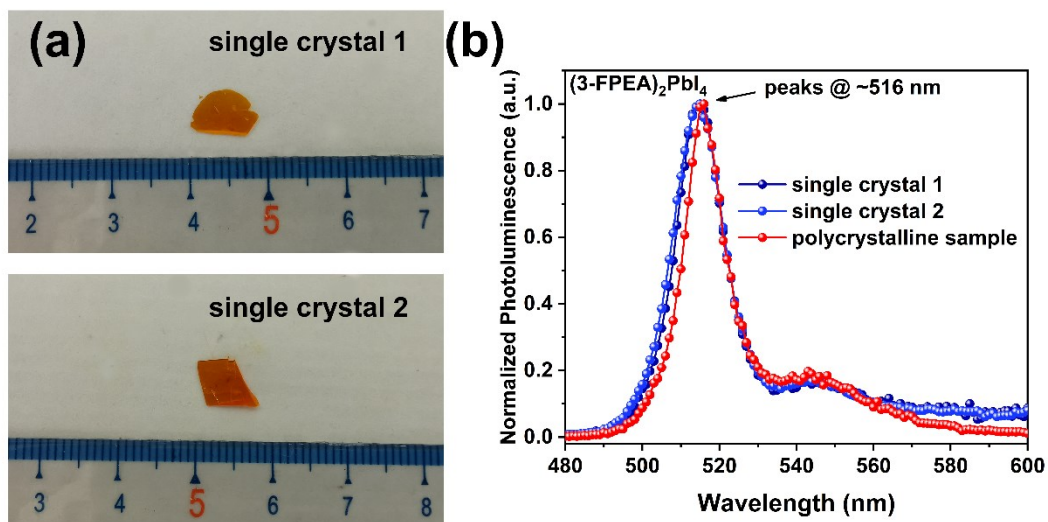

**Figure S10.** Photoluminescence spectra of (3-FPEA)<sub>2</sub>PbI<sub>4</sub> based on single crystal and polycrystalline samples, respectively. (a) Single crystals employed in the spectrum recoding. (b) The corresponding photoluminescence spectra.

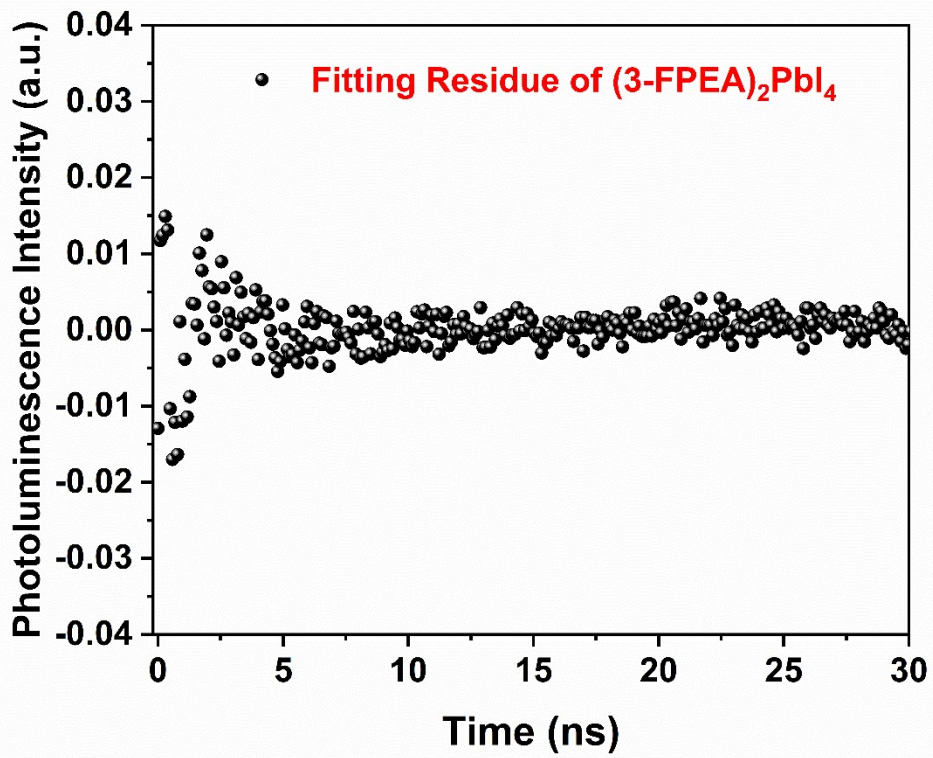

Figure S11. Residues for the lifetime decay fittings of (3-FPEA)<sub>2</sub>PbI<sub>4</sub>.

**Table S1.** Atomic coordinates ( $\times 10^4$ ) and equivalent isotropic displacement parameters ( $\text{\AA}^2 \times 10^3$ ) for  $(3\text{-FPEA})_2\text{PbI}_4$ .  $U_{(eq)}$  is defined as one third of the trace of the orthogonalized  $U^{ij}$  tensor.

|       | x        | y        | z       | $U_{(eq)}$ |
|-------|----------|----------|---------|------------|
| C(1)  | 2508(8)  | 4408(8)  | 8641(5) | 44(2)      |
| C(2)  | 1624(9)  | 4958(10) | 9130(6) | 53(2)      |
| C(3)  | 1861(9)  | 5973(9)  | 9346(6) | 53(2)      |
| C(4)  | 2912(10) | 6420(9)  | 9092(6) | 54(2)      |
| C(5)  | 3740(9)  | 5915(8)  | 8620(6) | 46(2)      |
| C(6)  | 3540(8)  | 4888(7)  | 8384(5) | 39(2)      |
| C(7)  | 4434(8)  | 4305(8)  | 7841(5) | 44(2)      |
| C(8)  | 4663(7)  | 4821(8)  | 6972(5) | 42(2)      |
| C(9)  | 4359(9)  | 977(8)   | 8623(5) | 47(2)      |
| C(10) | 5018(10) | 1462(10) | 9092(6) | 59(2)      |
| C(11) | 5923(10) | 1006(10) | 9330(6) | 58(2)      |
| C(12) | 6284(10) | -13(10)  | 9098(6) | 59(2)      |
| C(13) | 5610(8)  | -525(9)  | 8623(5) | 44(2)      |
| C(14) | 4674(7)  | -57(8)   | 8389(5) | 40(2)      |
| C(15) | 4028(8)  | -621(8)  | 7845(5) | 45(2)      |
| C(16) | 4575(8)  | -516(7)  | 6965(5) | 42(2)      |
| C(17) | 689(8)   | -605(8)  | 8647(5) | 44(2)      |
| C(18) | 1326(8)  | -73(9)   | 9131(6) | 50(2)      |
| C(19) | 998(8)   | 948(9)   | 9349(5) | 48(2)      |
| C(20) | 78(9)    | 1408(9)  | 9092(5) | 50(2)      |
| C(21) | -529(8)  | 928(8)   | 8614(5) | 43(2)      |
| C(22) | -220(7)  | -124(8)  | 8387(5) | 40(2)      |
| C(23) | -858(8)  | -688(8)  | 7846(5) | 46(2)      |
| C(24) | -655(7)  | -180(8)  | 6991(5) | 43(2)      |
| C(25) | 2095(11) | 3547(10) | 913(6)  | 57(2)      |
| C(26) | 3127(10) | 4026(10) | 682(6)  | 59(2)      |
| C(27) | 3325(10) | 5054(10) | 909(6)  | 56(2)      |
| C(28) | 2419(8)  | 5558(9)  | 1385(5) | 47(2)      |
| C(29) | 1370(8)  | 5051(7)  | 1622(5) | 38(2)      |
| C(30) | 1218(9)  | 4023(8)  | 1372(5) | 48(2)      |
| C(31) | 451(8)   | 5610(8)  | 2153(5) | 46(2)      |
| C(32) | 548(8)   | 5522(8)  | 3030(5) | 44(2)      |
| F(1)  | 3087(8)  | 7409(7)  | 9322(5) | 96(3)      |
| F(2)  | 1944(10) | 2561(9)  | 680(6)  | 130(3)     |
| F(3)  | 4711(10) | 2436(8)  | 9339(6) | 134(4)     |
| F(4)  | -198(7)  | 2414(6)  | 9314(5) | 91(2)      |
| I(1)  | 2987(1)  | 7782(1)  | 3032(1) | 30(1)      |

|        |         |         |         |       |
|--------|---------|---------|---------|-------|
| I(2)   | 1902(1) | 7199(1) | 6941(1) | 27(1) |
| I(5)   | 2126(1) | 2202(1) | 6940(1) | 27(1) |
| I(3)   | 1828(1) | 4977(1) | 5035(1) | 25(1) |
| I(4)   | 5051(1) | 3162(1) | 5020(1) | 26(1) |
| I(6)   | 60(1)   | 1837(1) | 4979(1) | 26(1) |
| I(8)   | 3154(1) | -24(1)  | 5036(1) | 25(1) |
| I(7)   | 2997(1) | 2780(1) | 3032(1) | 30(1) |
| N(1)   | 3658(6) | 4839(6) | 6603(4) | 37(2) |
| N(2)   | 488(5)  | 4381(6) | 3377(4) | 36(2) |
| N(3)   | 4685(5) | 626(6)  | 6625(4) | 36(2) |
| N(4)   | 534(6)  | -161(6) | 6604(4) | 37(2) |
| Pb(1)  | 2466(1) | 7504(1) | 4877(1) | 19(1) |
| Pb(2)  | 2592(1) | 2503(1) | 4892(1) | 24(1) |
| I(3')  | 3173(4) | 5017(4) | 4972(3) | 29(1) |
| I(4')  | 5058(4) | 1836(4) | 4982(3) | 29(1) |
| I(6')  | 52(4)   | 3167(4) | 5020(3) | 29(1) |
| I(8')  | 1847(4) | 17(4)   | 4975(3) | 29(1) |
| Pb(1') | 2395(6) | 7477(6) | 5143(3) | 20(1) |

**Table S2.** Bond lengths [Å] and angles [°] for (3-FPEA)<sub>2</sub>PbI<sub>4</sub> single crystal.

|              |           |
|--------------|-----------|
| C(1)-C(6)    | 1.368(13) |
| C(1)-C(2)    | 1.440(13) |
| C(1)-H(1)    | 0.95      |
| C(2)-C(3)    | 1.367(15) |
| C(2)-H(2)    | 0.95      |
| C(3)-C(4)    | 1.373(15) |
| C(3)-H(3)    | 0.95      |
| C(4)-F(1)    | 1.329(12) |
| C(4)-C(5)    | 1.353(14) |
| C(5)-C(6)    | 1.383(12) |
| C(5)-H(5)    | 0.95      |
| C(6)-C(7)    | 1.513(12) |
| C(7)-C(8)    | 1.522(12) |
| C(7)-H(7A)   | 0.99      |
| C(7)-H(7B)   | 0.99      |
| C(8)-N(1)    | 1.472(10) |
| C(8)-H(8A)   | 0.99      |
| C(8)-H(8B)   | 0.99      |
| C(9)-C(14)   | 1.389(13) |
| C(9)-C(10)   | 1.391(14) |
| C(9)-H(9)    | 0.95      |
| C(10)-C(11)  | 1.346(16) |
| C(10)-F(3)   | 1.327(13) |
| C(11)-C(12)  | 1.385(16) |
| C(11)-H(11)  | 0.95      |
| C(12)-C(13)  | 1.426(14) |
| C(12)-H(12)  | 0.95      |
| C(13)-C(14)  | 1.383(13) |
| C(13)-H(13)  | 0.95      |
| C(14)-C(15)  | 1.520(12) |
| C(15)-C(16)  | 1.509(12) |
| C(15)-H(15A) | 0.99      |
| C(15)-H(15B) | 0.99      |
| C(16)-N(3)   | 1.456(11) |
| C(16)-H(16A) | 0.99      |
| C(16)-H(16B) | 0.99      |
| C(17)-C(22)  | 1.379(13) |
| C(17)-C(18)  | 1.420(13) |
| C(17)-H(17)  | 0.95      |
| C(18)-C(19)  | 1.371(14) |
| C(18)-H(18)  | 0.95      |



|              |            |
|--------------|------------|
| C(19)-C(20)  | 1.379(15)  |
| C(19)-H(19)  | 0.95       |
| C(20)-F(4)   | 1.341(11)  |
| C(20)-C(21)  | 1.356(13)  |
| C(21)-C(22)  | 1.405(12)  |
| C(21)-H(21)  | 0.95       |
| C(22)-C(23)  | 1.510(12)  |
| C(23)-C(24)  | 1.498(13)  |
| C(23)-H(23A) | 0.99       |
| C(23)-H(23B) | 0.99       |
| C(24)-N(4)   | 1.479(10)  |
| C(24)-H(24A) | 0.99       |
| C(24)-H(24B) | 0.99       |
| C(25)-F(2)   | 1.321(14)  |
| C(25)-C(26)  | 1.364(16)  |
| C(25)-C(30)  | 1.365(14)  |
| C(26)-C(27)  | 1.377(16)  |
| C(26)-H(26)  | 0.95       |
| C(27)-C(28)  | 1.420(14)  |
| C(27)-H(27)  | 0.95       |
| C(28)-C(29)  | 1.397(13)  |
| C(28)-H(28)  | 0.95       |
| C(29)-C(30)  | 1.380(13)  |
| C(29)-C(31)  | 1.507(12)  |
| C(30)-H(30)  | 0.95       |
| C(31)-C(32)  | 1.501(12)  |
| C(31)-H(31A) | 0.99       |
| C(31)-H(31B) | 0.99       |
| C(32)-N(2)   | 1.459(11)  |
| C(32)-H(32A) | 0.99       |
| C(32)-H(32B) | 0.99       |
| I(1)-Pb(1)   | 3.0537(7)  |
| I(2)-Pb(1')  | 2.975(5)   |
| I(2)-Pb(1)   | 3.4142(7)  |
| I(5)-Pb(2)   | 3.3888(6)  |
| I(3)-Pb(1)   | 3.1575(11) |
| I(3)-Pb(2)   | 3.1783(6)  |
| I(4)-Pb(2)   | 3.1543(6)  |
| I(4)-Pb(1)#1 | 3.1699(11) |
| I(6)-Pb(1)#2 | 3.1579(11) |
| I(6)-Pb(2)   | 3.1682(6)  |
| I(8)-Pb(2)   | 3.1578(6)  |
| I(8)-Pb(1)#3 | 3.1790(11) |

|                 |           |
|-----------------|-----------|
| I(7)-Pb(2)      | 3.0769(6) |
| N(1)-H(1A)      | 0.91      |
| N(1)-H(1B)      | 0.91      |
| N(1)-H(1C)      | 0.91      |
| N(2)-H(2A)      | 0.91      |
| N(2)-H(2B)      | 0.91      |
| N(2)-H(2C)      | 0.91      |
| N(3)-H(3A)      | 0.91      |
| N(3)-H(3B)      | 0.91      |
| N(3)-H(3C)      | 0.91      |
| N(4)-H(4A)      | 0.91      |
| N(4)-H(4B)      | 0.91      |
| N(4)-H(4C)      | 0.91      |
| Pb(2)-I(4')     | 3.144(4)  |
| Pb(2)-I(8')     | 3.151(5)  |
| Pb(2)-I(3')     | 3.169(5)  |
| Pb(2)-I(6')     | 3.179(4)  |
| I(3')-Pb(1')    | 3.173(9)  |
| I(4')-Pb(1')#1  | 3.183(9)  |
| I(6')-Pb(1')#2  | 3.153(9)  |
| I(8')-Pb(1')#3  | 3.171(9)  |
|                 |           |
| C(6)-C(1)-C(2)  | 121.7(9)  |
| C(6)-C(1)-H(1)  | 119.2     |
| C(2)-C(1)-H(1)  | 119.2     |
| C(3)-C(2)-C(1)  | 117.3(10) |
| C(3)-C(2)-H(2)  | 121.3     |
| C(1)-C(2)-H(2)  | 121.3     |
| C(4)-C(3)-C(2)  | 119.4(10) |
| C(4)-C(3)-H(3)  | 120.3     |
| C(2)-C(3)-H(3)  | 120.3     |
| F(1)-C(4)-C(5)  | 120.2(11) |
| F(1)-C(4)-C(3)  | 116.4(10) |
| C(5)-C(4)-C(3)  | 123.4(10) |
| C(4)-C(5)-C(6)  | 119.3(10) |
| C(4)-C(5)-H(5)  | 120.3     |
| C(6)-C(5)-H(5)  | 120.3     |
| C(1)-C(6)-C(5)  | 118.8(9)  |
| C(1)-C(6)-C(7)  | 120.1(8)  |
| C(5)-C(6)-C(7)  | 121.1(9)  |
| C(6)-C(7)-C(8)  | 113.2(7)  |
| C(6)-C(7)-H(7A) | 108.9     |
| C(8)-C(7)-H(7A) | 108.9     |

|                     |           |
|---------------------|-----------|
| C(6)-C(7)-H(7B)     | 108.9     |
| C(8)-C(7)-H(7B)     | 108.9     |
| H(7A)-C(7)-H(7B)    | 107.8     |
| N(1)-C(8)-C(7)      | 112.1(7)  |
| N(1)-C(8)-H(8A)     | 109.2     |
| C(7)-C(8)-H(8A)     | 109.2     |
| N(1)-C(8)-H(8B)     | 109.2     |
| C(7)-C(8)-H(8B)     | 109.2     |
| H(8A)-C(8)-H(8B)    | 107.9     |
| C(14)-C(9)-C(10)    | 116.5(10) |
| C(14)-C(9)-H(9)     | 121.8     |
| C(10)-C(9)-H(9)     | 121.8     |
| C(11)-C(10)-F(3)    | 117.8(11) |
| C(11)-C(10)-C(9)    | 125.0(11) |
| F(3)-C(10)-C(9)     | 117.2(12) |
| C(10)-C(11)-C(12)   | 120.7(10) |
| C(10)-C(11)-H(11)   | 119.7     |
| C(12)-C(11)-H(11)   | 119.7     |
| C(11)-C(12)-C(13)   | 114.9(11) |
| C(11)-C(12)-H(12)   | 122.6     |
| C(13)-C(12)-H(12)   | 122.6     |
| C(14)-C(13)-C(12)   | 124.1(10) |
| C(14)-C(13)-H(13)   | 118       |
| C(12)-C(13)-H(13)   | 118       |
| C(9)-C(14)-C(13)    | 118.8(9)  |
| C(9)-C(14)-C(15)    | 119.7(9)  |
| C(13)-C(14)-C(15)   | 121.4(9)  |
| C(16)-C(15)-C(14)   | 113.9(7)  |
| C(16)-C(15)-H(15A)  | 108.8     |
| C(14)-C(15)-H(15A)  | 108.8     |
| C(16)-C(15)-H(15B)  | 108.8     |
| C(14)-C(15)-H(15B)  | 108.8     |
| H(15A)-C(15)-H(15B) | 107.7     |
| N(3)-C(16)-C(15)    | 112.1(8)  |
| N(3)-C(16)-H(16A)   | 109.2     |
| C(15)-C(16)-H(16A)  | 109.2     |
| N(3)-C(16)-H(16B)   | 109.2     |
| C(15)-C(16)-H(16B)  | 109.2     |
| H(16A)-C(16)-H(16B) | 107.9     |
| C(22)-C(17)-C(18)   | 122.3(9)  |
| C(22)-C(17)-H(17)   | 118.8     |
| C(18)-C(17)-H(17)   | 118.8     |
| C(19)-C(18)-C(17)   | 117.6(10) |

|                     |           |
|---------------------|-----------|
| C(19)-C(18)-H(18)   | 121.2     |
| C(17)-C(18)-H(18)   | 121.2     |
| C(20)-C(19)-C(18)   | 119.0(9)  |
| C(20)-C(19)-H(19)   | 120.5     |
| C(18)-C(19)-H(19)   | 120.5     |
| F(4)-C(20)-C(21)    | 119.0(10) |
| F(4)-C(20)-C(19)    | 116.6(9)  |
| C(21)-C(20)-C(19)   | 124.4(10) |
| C(20)-C(21)-C(22)   | 117.8(10) |
| C(20)-C(21)-H(21)   | 121.1     |
| C(22)-C(21)-H(21)   | 121.1     |
| C(17)-C(22)-C(21)   | 118.7(9)  |
| C(17)-C(22)-C(23)   | 121.3(9)  |
| C(21)-C(22)-C(23)   | 119.9(9)  |
| C(24)-C(23)-C(22)   | 113.4(8)  |
| C(24)-C(23)-H(23A)  | 108.9     |
| C(22)-C(23)-H(23A)  | 108.9     |
| C(24)-C(23)-H(23B)  | 108.9     |
| C(22)-C(23)-H(23B)  | 108.9     |
| H(23A)-C(23)-H(23B) | 107.7     |
| N(4)-C(24)-C(23)    | 113.1(8)  |
| N(4)-C(24)-H(24A)   | 109       |
| C(23)-C(24)-H(24A)  | 109       |
| N(4)-C(24)-H(24B)   | 109       |
| C(23)-C(24)-H(24B)  | 109       |
| H(24A)-C(24)-H(24B) | 107.8     |
| F(2)-C(25)-C(26)    | 117.6(11) |
| F(2)-C(25)-C(30)    | 118.5(12) |
| C(26)-C(25)-C(30)   | 123.9(11) |
| C(25)-C(26)-C(27)   | 119.8(10) |
| C(25)-C(26)-H(26)   | 120.1     |
| C(27)-C(26)-H(26)   | 120.1     |
| C(26)-C(27)-C(28)   | 116.8(11) |
| C(26)-C(27)-H(27)   | 121.6     |
| C(28)-C(27)-H(27)   | 121.6     |
| C(29)-C(28)-C(27)   | 122.6(10) |
| C(29)-C(28)-H(28)   | 118.7     |
| C(27)-C(28)-H(28)   | 118.7     |
| C(30)-C(29)-C(28)   | 118.0(9)  |
| C(30)-C(29)-C(31)   | 121.8(9)  |
| C(28)-C(29)-C(31)   | 120.2(9)  |
| C(25)-C(30)-C(29)   | 118.9(10) |
| C(25)-C(30)-H(30)   | 120.6     |

|                     |           |
|---------------------|-----------|
| C(29)-C(30)-H(30)   | 120.6     |
| C(32)-C(31)-C(29)   | 114.0(7)  |
| C(32)-C(31)-H(31A)  | 108.7     |
| C(29)-C(31)-H(31A)  | 108.7     |
| C(32)-C(31)-H(31B)  | 108.7     |
| C(29)-C(31)-H(31B)  | 108.7     |
| H(31A)-C(31)-H(31B) | 107.6     |
| N(2)-C(32)-C(31)    | 111.8(8)  |
| N(2)-C(32)-H(32A)   | 109.3     |
| C(31)-C(32)-H(32A)  | 109.3     |
| N(2)-C(32)-H(32B)   | 109.3     |
| C(31)-C(32)-H(32B)  | 109.3     |
| H(32A)-C(32)-H(32B) | 107.9     |
| Pb(1)-I(3)-Pb(2)    | 149.01(2) |
| Pb(2)-I(4)-Pb(1)#1  | 150.28(3) |
| Pb(1)#2-I(6)-Pb(2)  | 150.18(3) |
| Pb(2)-I(8)-Pb(1)#3  | 148.99(2) |
| C(8)-N(1)-H(1A)     | 109.5     |
| C(8)-N(1)-H(1B)     | 109.5     |
| H(1A)-N(1)-H(1B)    | 109.5     |
| C(8)-N(1)-H(1C)     | 109.5     |
| H(1A)-N(1)-H(1C)    | 109.5     |
| H(1B)-N(1)-H(1C)    | 109.5     |
| C(32)-N(2)-H(2A)    | 109.5     |
| C(32)-N(2)-H(2B)    | 109.5     |
| H(2A)-N(2)-H(2B)    | 109.5     |
| C(32)-N(2)-H(2C)    | 109.5     |
| H(2A)-N(2)-H(2C)    | 109.5     |
| H(2B)-N(2)-H(2C)    | 109.5     |
| C(16)-N(3)-H(3A)    | 109.5     |
| C(16)-N(3)-H(3B)    | 109.5     |
| H(3A)-N(3)-H(3B)    | 109.5     |
| C(16)-N(3)-H(3C)    | 109.5     |
| H(3A)-N(3)-H(3C)    | 109.5     |
| H(3B)-N(3)-H(3C)    | 109.5     |
| C(24)-N(4)-H(4A)    | 109.5     |
| C(24)-N(4)-H(4B)    | 109.5     |
| H(4A)-N(4)-H(4B)    | 109.5     |
| C(24)-N(4)-H(4C)    | 109.5     |
| H(4A)-N(4)-H(4C)    | 109.5     |
| H(4B)-N(4)-H(4C)    | 109.5     |
| I(1)-Pb(1)-I(6)#2   | 95.30(3)  |
| I(1)-Pb(1)-I(3)     | 96.27(2)  |

|                     |             |
|---------------------|-------------|
| I(6)#2-Pb(1)-I(3)   | 91.49(3)    |
| I(1)-Pb(1)-I(4)#1   | 92.09(2)    |
| I(6)#2-Pb(1)-I(4)#1 | 172.57(2)   |
| I(3)-Pb(1)-I(4)#1   | 88.49(3)    |
| I(1)-Pb(1)-I(8)#4   | 93.17(3)    |
| I(6)#2-Pb(1)-I(8)#4 | 90.67(3)    |
| I(3)-Pb(1)-I(8)#4   | 170.07(2)   |
| I(4)#1-Pb(1)-I(8)#4 | 88.12(3)    |
| I(1)-Pb(1)-I(2)     | 179.57(4)   |
| I(6)#2-Pb(1)-I(2)   | 85.06(2)    |
| I(3)-Pb(1)-I(2)     | 83.95(2)    |
| I(4)#1-Pb(1)-I(2)   | 87.55(2)    |
| I(8)#4-Pb(1)-I(2)   | 86.58(2)    |
| I(7)-Pb(2)-I(4')    | 94.36(9)    |
| I(7)-Pb(2)-I(4)     | 94.885(16)  |
| I(7)-Pb(2)-I(8')    | 93.26(9)    |
| I(4')-Pb(2)-I(8')   | 91.36(13)   |
| I(7)-Pb(2)-I(8)     | 95.815(16)  |
| I(4)-Pb(2)-I(8)     | 91.420(15)  |
| I(7)-Pb(2)-I(3')    | 91.56(9)    |
| I(4')-Pb(2)-I(3')   | 91.33(13)   |
| I(8')-Pb(2)-I(3')   | 174.29(12)  |
| I(7)-Pb(2)-I(6)     | 91.562(16)  |
| I(4)-Pb(2)-I(6)     | 173.514(17) |
| I(8)-Pb(2)-I(6)     | 88.631(15)  |
| I(7)-Pb(2)-I(3)     | 92.750(16)  |
| I(4)-Pb(2)-I(3)     | 90.871(15)  |
| I(8)-Pb(2)-I(3)     | 170.913(17) |
| I(6)-Pb(2)-I(3)     | 88.103(15)  |
| I(7)-Pb(2)-I(6')    | 92.16(9)    |
| I(4')-Pb(2)-I(6')   | 173.46(13)  |
| I(8')-Pb(2)-I(6')   | 88.77(13)   |
| I(3')-Pb(2)-I(6')   | 87.98(13)   |
| I(7)-Pb(2)-I(5)     | 179.553(15) |
| I(4')-Pb(2)-I(5)    | 86.08(9)    |
| I(4)-Pb(2)-I(5)     | 85.508(14)  |
| I(8')-Pb(2)-I(5)    | 86.72(9)    |
| I(8)-Pb(2)-I(5)     | 84.386(15)  |
| I(3')-Pb(2)-I(5)    | 88.44(9)    |
| I(6)-Pb(2)-I(5)     | 88.042(15)  |
| I(3)-Pb(2)-I(5)     | 87.029(15)  |
| I(6')-Pb(2)-I(5)    | 87.39(9)    |
| Pb(1')-I(3')-Pb(2)  | 150.1(2)    |

|                      |          |
|----------------------|----------|
| Pb(2)-I(4')-Pb(1')#1 | 149.6(2) |
| Pb(1')#2-I(6')-Pb(2) | 148.7(2) |
| Pb(2)-I(8')-Pb(1')#3 | 150.5(2) |
| I(2)-Pb(1')-I(3')    | 94.1(2)  |
| I(2)-Pb(1')-I(4')#1  | 95.0(2)  |
| I(2)-Pb(1')-I(6')#2  | 93.6(2)  |
| I(2)-Pb(1')-I(8')#4  | 96.1(2)  |

Symmetry transformations used to generate equivalent atoms:

#1  $-x+1, -y+1, -z+1$     #2  $-x, -y+1, -z+1$     #3  $x, y-1, z$     #4  $x, y+1, z$

**Table S3.** Anisotropic displacement parameters ( $\text{\AA}^2 \times 10^3$ ) for  $(3\text{-FPEA})_2\text{PbI}_4$  single crystal.

|       | U <sup>11</sup> | U <sup>22</sup> | U <sup>33</sup> | U <sup>23</sup> | U <sup>13</sup> | U <sup>12</sup> |
|-------|-----------------|-----------------|-----------------|-----------------|-----------------|-----------------|
| C(1)  | 57(5)           | 50(5)           | 30(4)           | -7(3)           | -18(4)          | 1(4)            |
| C(2)  | 55(5)           | 70(5)           | 39(4)           | -2(4)           | -25(4)          | 12(4)           |
| C(3)  | 65(5)           | 61(5)           | 35(4)           | -7(4)           | -14(4)          | 23(4)           |
| C(4)  | 80(5)           | 46(5)           | 37(4)           | -9(4)           | -13(4)          | 7(4)            |
| C(5)  | 61(5)           | 43(4)           | 36(4)           | -2(3)           | -14(4)          | 1(4)            |
| C(6)  | 53(4)           | 39(4)           | 27(3)           | -4(3)           | -17(3)          | 7(3)            |
| C(7)  | 47(4)           | 50(5)           | 38(4)           | -4(4)           | -20(4)          | 15(4)           |
| C(8)  | 34(4)           | 61(5)           | 34(4)           | -11(4)          | -9(3)           | 6(4)            |
| C(9)  | 57(5)           | 46(5)           | 32(4)           | 4(3)            | 3(4)            | -3(4)           |
| C(10) | 87(6)           | 51(5)           | 36(4)           | -9(4)           | 5(4)            | -9(4)           |
| C(11) | 68(5)           | 78(6)           | 29(4)           | -3(4)           | -11(4)          | -26(5)          |
| C(12) | 62(5)           | 78(6)           | 30(4)           | -1(4)           | 7(4)            | -18(5)          |
| C(13) | 47(4)           | 54(5)           | 28(4)           | -2(3)           | 2(3)            | -4(4)           |
| C(14) | 43(4)           | 45(4)           | 29(3)           | 0(3)            | 1(3)            | -9(3)           |
| C(15) | 48(4)           | 46(5)           | 37(4)           | 5(4)            | -4(4)           | -15(4)          |
| C(16) | 50(5)           | 36(4)           | 41(4)           | 0(3)            | -13(4)          | -4(4)           |
| C(17) | 49(4)           | 50(5)           | 29(4)           | -6(3)           | 4(3)            | -4(4)           |
| C(18) | 42(4)           | 67(5)           | 35(4)           | 1(4)            | 4(4)            | -8(4)           |
| C(19) | 58(5)           | 56(5)           | 30(4)           | -6(4)           | -4(4)           | -20(4)          |
| C(20) | 71(5)           | 46(5)           | 30(4)           | -13(3)          | 3(4)            | -5(4)           |
| C(21) | 55(4)           | 43(4)           | 26(4)           | -5(3)           | 6(3)            | -3(4)           |
| C(22) | 44(4)           | 43(4)           | 27(3)           | -3(3)           | 9(3)            | -8(3)           |
| C(23) | 44(4)           | 52(5)           | 38(4)           | -6(4)           | 5(4)            | -14(4)          |
| C(24) | 35(4)           | 58(5)           | 39(4)           | -11(4)          | -10(4)          | -4(4)           |
| C(25) | 90(6)           | 55(5)           | 29(4)           | -7(4)           | -17(4)          | 13(5)           |
| C(26) | 71(5)           | 71(6)           | 34(4)           | -1(4)           | -11(4)          | 26(5)           |
| C(27) | 66(5)           | 71(6)           | 35(4)           | -4(4)           | -22(4)          | 13(5)           |
| C(28) | 52(4)           | 56(5)           | 33(4)           | -3(4)           | -10(4)          | 3(4)            |
| C(29) | 50(4)           | 40(4)           | 27(3)           | 3(3)            | -17(3)          | 6(3)            |
| C(30) | 66(5)           | 51(5)           | 30(4)           | 3(3)            | -15(4)          | 2(4)            |
| C(31) | 51(4)           | 47(5)           | 37(4)           | 7(4)            | -11(4)          | 14(4)           |
| C(32) | 50(5)           | 40(5)           | 39(4)           | -1(4)           | 3(4)            | 2(4)            |
| F(1)  | 152(7)          | 60(5)           | 73(5)           | -14(4)          | -9(5)           | -4(5)           |
| F(2)  | 198(10)         | 93(7)           | 98(7)           | -17(6)          | -23(7)          | -1(7)           |
| F(3)  | 197(10)         | 87(7)           | 112(8)          | -17(6)          | -6(7)           | 8(7)            |
| F(4)  | 144(7)          | 57(5)           | 71(5)           | -16(4)          | -9(5)           | 13(4)           |
| I(1)  | 32(1)           | 34(1)           | 26(1)           | -3(1)           | -5(1)           | -5(1)           |
| I(2)  | 31(1)           | 24(1)           | 27(1)           | -3(1)           | -7(1)           | 3(1)            |



|        |       |       |       |       |        |       |
|--------|-------|-------|-------|-------|--------|-------|
| I(5)   | 29(1) | 24(1) | 27(1) | -3(1) | -3(1)  | -3(1) |
| I(3)   | 29(1) | 14(1) | 33(1) | -4(1) | -10(1) | 1(1)  |
| I(4)   | 14(1) | 28(1) | 36(1) | 1(1)  | -6(1)  | -1(1) |
| I(6)   | 15(1) | 28(1) | 36(1) | 1(1)  | -8(1)  | 0(1)  |
| I(8)   | 26(1) | 15(1) | 33(1) | -4(1) | -3(1)  | 0(1)  |
| I(7)   | 32(1) | 34(1) | 25(1) | -3(1) | -5(1)  | 6(1)  |
| N(1)   | 43(4) | 35(4) | 32(4) | 1(3)  | -6(3)  | 2(3)  |
| N(2)   | 32(3) | 40(4) | 34(4) | -2(3) | -3(3)  | 1(3)  |
| N(3)   | 34(3) | 36(4) | 38(4) | -5(3) | -6(3)  | -2(3) |
| N(4)   | 39(4) | 41(4) | 32(4) | -1(3) | -8(3)  | -2(3) |
| Pb(1)  | 17(1) | 17(1) | 23(1) | -1(1) | -4(1)  | 0(1)  |
| Pb(2)  | 18(1) | 17(1) | 36(1) | -2(1) | -8(1)  | 0(1)  |
| I(3')  | 33(2) | 19(2) | 36(3) | -6(2) | -9(2)  | 0(2)  |
| I(4')  | 17(2) | 35(3) | 35(2) | 5(2)  | -7(2)  | 0(2)  |
| I(6')  | 19(2) | 33(3) | 35(2) | 1(2)  | -8(2)  | 2(2)  |
| I(8')  | 30(2) | 21(2) | 36(3) | -6(2) | -2(2)  | 1(2)  |
| Pb(1') | 12(2) | 12(2) | 36(3) | 0(3)  | -7(3)  | 1(1)  |

**Table S4.** Hydrogen coordinates ( $\times 10^4$ ) and isotropic displacement parameters ( $\text{\AA}^2 \times 10^3$ ) for  $(3\text{-FPEA})_2\text{PbI}_4$  single crystal.

|        | x     | y     | z    | $U_{(eq)}$ |
|--------|-------|-------|------|------------|
| H(1)   | 2372  | 3695  | 8492 | 53         |
| H(2)   | 904   | 4628  | 9296 | 63         |
| H(3)   | 1304  | 6365  | 9670 | 63         |
| H(5)   | 4451  | 6263  | 8453 | 55         |
| H(7A)  | 4202  | 3527  | 7845 | 52         |
| H(7B)  | 5132  | 4316  | 8062 | 52         |
| H(8A)  | 4948  | 5583  | 6962 | 51         |
| H(8B)  | 5248  | 4400  | 6649 | 51         |
| H(9)   | 3728  | 1334  | 8471 | 56         |
| H(11)  | 6318  | 1387  | 9661 | 70         |
| H(12)  | 6931  | -345  | 9244 | 71         |
| H(13)  | 5816  | -1231 | 8458 | 53         |
| H(15A) | 3937  | -1411 | 8037 | 54         |
| H(15B) | 3275  | -303  | 7895 | 54         |
| H(16A) | 5324  | -845  | 6909 | 51         |
| H(16B) | 4127  | -932  | 6655 | 51         |
| H(17)  | 896   | -1319 | 8497 | 53         |
| H(18)  | 1958  | -412  | 9297 | 60         |
| H(19)  | 1399  | 1334  | 9674 | 58         |
| H(21)  | -1144 | 1291  | 8440 | 52         |
| H(23A) | -645  | -1471 | 7848 | 55         |
| H(23B) | -1665 | -664  | 8070 | 55         |
| H(24A) | -1088 | -597  | 6672 | 52         |
| H(24B) | -930  | 583   | 6984 | 52         |
| H(26)  | 3707  | 3652  | 364  | 71         |
| H(27)  | 4035  | 5408  | 754  | 67         |
| H(28)  | 2530  | 6268  | 1550 | 56         |
| H(30)  | 515   | 3654  | 1518 | 58         |
| H(31A) | 452   | 6397  | 1955 | 55         |
| H(31B) | -273  | 5283  | 2103 | 55         |
| H(32A) | 1265  | 5858  | 3087 | 53         |
| H(32B) | -61   | 5938  | 3334 | 53         |
| H(1A)  | 3336  | 4157  | 6677 | 55         |
| H(1B)  | 3850  | 5046  | 6064 | 55         |
| H(1C)  | 3168  | 5327  | 6839 | 55         |
| H(2A)  | -96   | 4030  | 3236 | 54         |
| H(2B)  | 392   | 4363  | 3925 | 54         |
| H(2C)  | 1132  | 4039  | 3186 | 54         |

|       |      |      |      |    |
|-------|------|------|------|----|
| H(3A) | 4026 | 970  | 6766 | 54 |
| H(3B) | 4868 | 650  | 6077 | 54 |
| H(3C) | 5228 | 970  | 6821 | 54 |
| H(4A) | 901  | 381  | 6793 | 56 |
| H(4B) | 592  | -32  | 6059 | 56 |
| H(4C) | 839  | -822 | 6722 | 56 |
